# Supplementary material
Source: publisher figshare collection journal article supplement (https://frontiersin.figshare.com/ndownloader/files/18197408)
Supplement: Supplementary file [file 18197408]

Supplementary data

Figure S1. Phylogenetic trees based on (A) the *agr* hypervariable region (*agrB* to *agrD*) and (B) the *cap* hypervariable region (*capH* to *capK*) of the 21 genomes of *S. lugdunensis*.

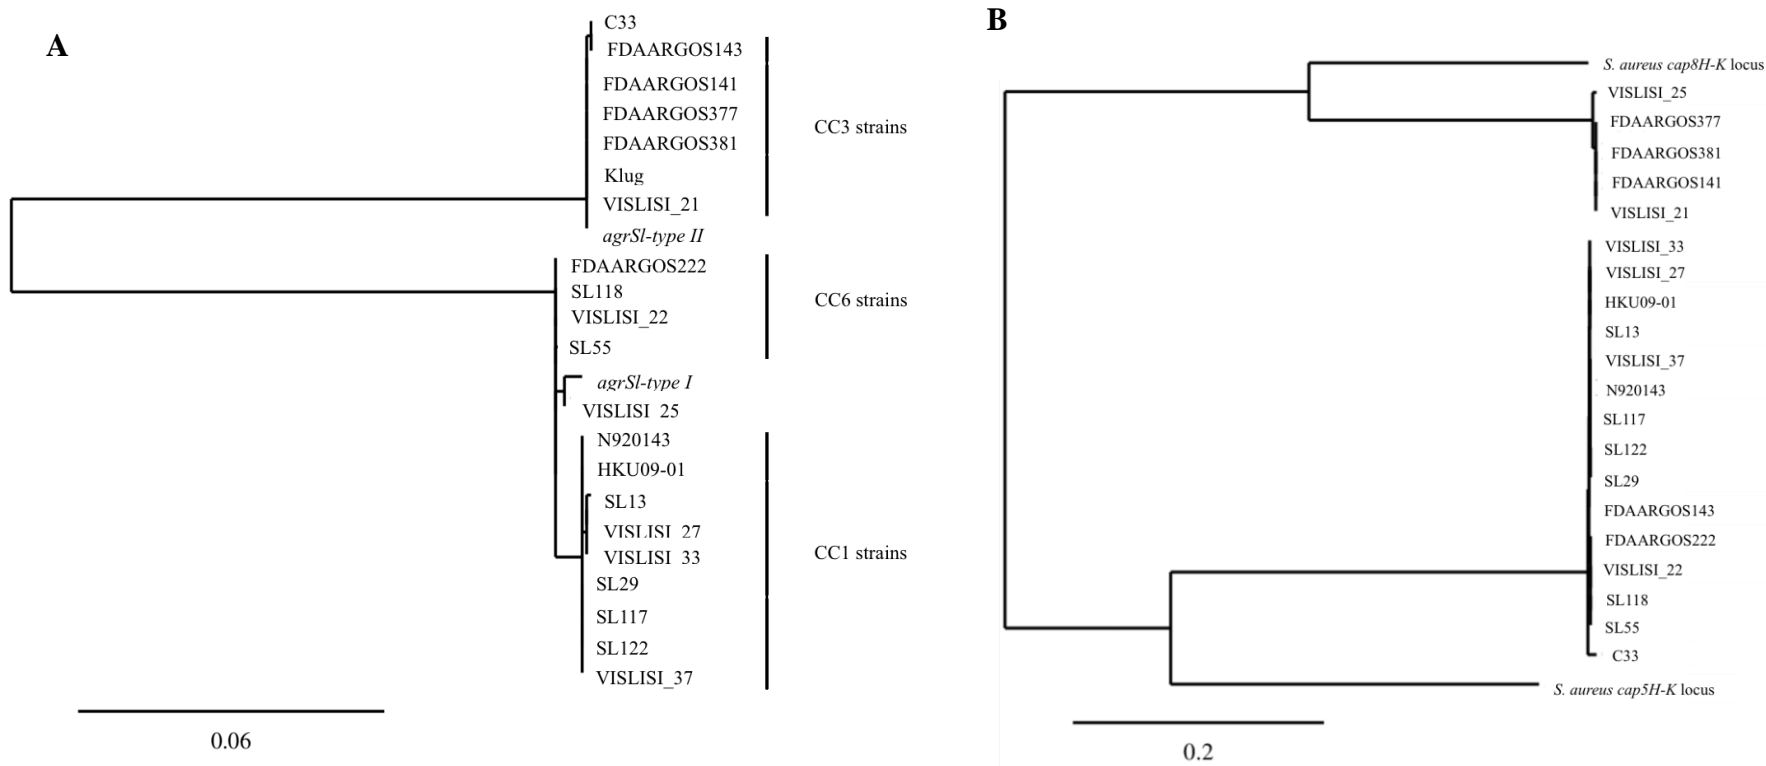

**Table S1. Clinical and geographical origins of strains with complete genomes available in NCBI.**

| <i>S. lugdunensis</i> strains | NCBI accession numbers | Isolation source               | Country    |
|-------------------------------|------------------------|--------------------------------|------------|
| HKU0901                       | NC_013893              | Skin and soft tissue infection | Hong Kong  |
| N920143                       | NC_017353              | Skin and soft tissue infection | France     |
| FDAARGOS141                   | NZ_CP014022            | Bursitis                       | USA        |
| FDAARGOS143                   | NZ_CP014023            | Skin and soft tissue infection | USA        |
| FDAARGOS222                   | NZ_CP020406            | Skin and soft tissue infection | Strasbourg |
| Klug93G4                      | NZ_CP017069            | Carriage                       | Hong Kong  |
| FDAARGOS377                   | NZ_CP023539            | Abscess                        | USA        |
| FDAARGOS381                   | NZ_CP023970            | Abscess                        | USA        |
| VISLISI_21                    | NZ_CP020762            | Bacteraemia                    | France     |
| VISLISI_22                    | NZ_CP020764            | Infective endocarditis         | France     |
| VISLISI_25                    | NZ_CP020763            | Material infection             | France     |
| VISLISI_27                    | NZ_CP020735            | Material infection             | France     |
| VISLISI_33                    | NZ_CP020769            | Liver abscess                  | France     |
| VISLISI_37                    | NZ_CP020761            | Infective endocarditis         | France     |
| C33                           | NZ_CP020768            | Carriage                       | France     |
